# Supplementary material for: Impact of Plant Growth-Promoting Rhizobacteria Inoculation and Grafting on Tolerance of Tomato to Combined Water and Nutrient Stress Assessed via Metabolomics Analysis
Source: Front Plant Sci. 2021 Jun 4;12:670236. doi: 10.3389/fpls.2021.670236 (PMC8212936; doi:10.3389/fpls.2021.670236)
Supplement: Supplementary Data set 1 — Annotated metabolite features in the GC/EI/MS profiles of Solanum lycopersicum L. leaves. [file Data_Sheet_1.xlsx]

## Sheet: TOMRES TOMATO
Quant mass	Metabolite name	Metabolite derivative	Metabolite synonym(s)	KEGG ID	Golm Metabolome Database ID	PubChem CID	Biosynthetic pathway(s)	Abbreviated Biosynthetic pathway(s)	Molecular Formula	Chemical group
147	Ethylene glycol	Ethylene glycol (2TMS)	Ethylene glycol;1,2-Ethanediol;Ethane-1,2-diol	C01380	n/a	4575	map00625Chloroalkane and chloroalkene degradation map00630Glyoxylate and dicarboxylate metabolism map01100Metabolic pathways map01120Microbial metabolism in diverse environments	map00625 map00630 map01100 map01120	C2H6O2	Alcohols
221	Boric acid	Boric acid (3TMS)	n/a	C12486	A098003	582876	R07697	R07697	H3BO3	Heterocyclic compounds
174	Pyruvate	Pyruvate (1TMS, 1MeOX)	Pyruvic acid; 2-Oxopropanoate; 2-Oxopropanoic acid; Pyroracemic acid	C00022	A104002	1060	MULTIPLE	MULTIPLE	C3H4O3	Carboxylic acids
147	L-Lactic acid	L-Lactic acid (2TMS)	(S)-Lactate; L-Lactate;	C00186	n/a	107689	map00010Glycolysis / Gluconeogenesismap00051 Fructose and mannose metabolismmap00620 Pyruvate metabolismmap00640 Propanoate metabolismmap00643 Styrene degradationmap01100 Metabolic pathwaysmap01110 Biosynthesis of secondary metabolitesmap01120 Microbial metabolism in diverse environmentsmap01130 Biosynthesis of antibioticsmap04024 cAMP signaling pathway map04066 HIF-1 signaling pathwaymap04922 Gl…	map00010 map00051 map00620 map00640 map00643 map01100 map01110 map01120 map01130 map04024 map04066 map04922 map05230	C3H6O3	Carboxylic acids
73	2-Methyl-4-pentenoic acid	2-Methyl-4-pentenoic acid (TMS)	2-Methyl-4-pentenoic acid (TMS)	n/a	n/a	n/a	n/a	n/a	n/a	Carboxylic acids
147	Acetic acid	Acetic acid (2TMS)	Acetate; Acetic acid; Ethanoic acid	C00033	n/a	3335	map00010Glycolysis / Gluconeogenesis map00430Taurine and hypotaurine metabolism map00440Phosphonate and phosphinate metabolism map00534Glycosaminoglycan biosynthesis - heparan sulfate / heparin map00620Pyruvate metabolism map00640Propanoate metabolism map00660C5-Branched dibasic acid metabolism map00680Methane metabolism map00720Carbon fixation pathways in prokaryotes map00908Zeatin biosynthesis …	map00010 map00430 map00440 map00534 map00620 map00640 map00660 map00680 map00720 map00908 map00920 map01100 map01110 map01120 map01130 map01200 map01220 map04725 map04973 map04974	C2H4O2	Fatty acyls; Fatty Acids and Conjugates
72	L-Valine	L-Valine (1TMS)	2-Amino-3-methylbutyric acid	C00183	A122001	6287	map00280Valine, leucine and isoleucine degradation map00290Valine, leucine and isoleucine biosynthesis map00460Cyanoamino acid metabolism map00770Pantothenate and CoA biosynthesis map00966Glucosinolate biosynthesis map00970Aminoacyl-tRNA biosynthesis map01063Biosynthesis of alkaloids derived from shikimate pathway map012102-Oxocarboxylic acid metabolism map01230Biosynthesis of amino acids map0201…	map00280 map00290 map00460 map00770 map00966 map00970 map01063 map01210 map01230 map02010	C5H11NO2	Amino acids
116	L-Alanine	L-Alanine (2TMS)	L-2-Aminopropionic acid; L-alpha-Alanine	C00041	A110001	5950	map00250Alanine, aspartate and glutamate metabolism map00270Cysteine and methionine metabolism map00430Taurine and hypotaurine metabolism map00450Selenocompound metabolism map00473D-Alanine metabolism map00710Carbon fixation in photosynthetic organisms map00970Aminoacyl-tRNA biosynthesis map01060Biosynthesis of plant secondary metabolites map01120Microbial metabolism in diverse environments map01…	map00250 map00270 map00430 metabolism map00450 map00473 map00710 map00970 map01060 map01120 map01200 map01230 map02010	C3H7NO2	Amino acids
156	Piperidine-2-carboxylic acid	Piperidine-2-carboxylic acid (2TMS)	PIPECOLIC ACID	n/a	A137004	n/a	n/a	n/a	n/a	Carboxylic acids
147	Oxalic acid	Oxalic acid (2TMS)	Oxalate;Ethanedioic acid	C00209	A113002	971	map00625Chloroalkane and chloroalkene degradation map00630Glyoxylate and dicarboxylate metabolism map01100Metabolic pathways map01120Microbial metabolism in diverse environments	map00625 map00630 map01100 map01120	C2H2O4	Carboxylic acids
86	L-Leucine	L-Leucine (1TMS)	L-Leucine; 2-Amino-4-methylvaleric acid; (2S)-alpha-2-Amino-4-methylvaleric acid; (2S)-alpha-Leucine	C00123	A118001	6106	map00280Valine, leucine and isoleucine degradation map00290Valine, leucine and isoleucine biosynthesis map00966Glucosinolate biosynthesis map00970Aminoacyl-tRNA biosynthesis map01060Biosynthesis of plant secondary metabolites map01065Biosynthesis of alkaloids derived from histidine and purine map01100Metabolic pathways map01110Biosynthesis of secondary metabolites map012102-Oxocarboxylic acid met…	map00280 map00290 map00966 map00970 map01060 map01065 map01100 map01110 map01210 map01230 map02010 map04150 map04974 map04978 map05230	C6H13NO2	Amino acids
86	L-Isoleucine	L-Isoleucine (1TMS)	2-Amino-3-methylvaleric acid	C00407	A119002	6306	map00280 Valine leucine and isoleucine degradationmap00290 Valine leucine and isoleucine biosynthesismap00460 Cyanoamino acid metabolismmap00960 Tropane piperidine and pyridine alkaloid biosynthesismap00966 Glucosinolate biosynthesismap00970 Aminoacyl-tRNA biosynthesismap01110 Biosynthesis of secondary metabolitesmap01210 2-Oxocarboxylic acid metabolismmap01230 biosynthesis of amino acidsmap02010…	map00280 map00290 map00460 map00960 map00966 map00970 map01210 map02010 map04974 map04978	C6H13NO2	Amino acids
241	Phosphoric acid monomethyl ester	Phosphoric acid monomethyl ester (2TMS)	Orthophosphate; Phosphate; Orthophosphoric acid	C00009	A129001	1004	map00190Oxidative phosphorylation map00550Peptidoglycan biosynthesis	map00190 map00550	H3PO4	Phosphoric acid derivatives; Phosphoric acid
147	Malonic acid	Malonic acid (2TMS)	Malonate; Propanedioic acid	C00383	A122003	867	map00240Pyrimidine metabolism map00410beta-Alanine metabolism	map00240 map00410	C3H4O4	Carboxylic acids
144	L-Valine	L-Valine (2TMS)	2-Amino-3-methylbutyric acid	C00183	A122001	6287	map00280Valine, leucine and isoleucine degradation map00290Valine, leucine and isoleucine biosynthesis map00460Cyanoamino acid metabolism map00770Pantothenate and CoA biosynthesis map00966Glucosinolate biosynthesis map00970Aminoacyl-tRNA biosynthesis map01063Biosynthesis of alkaloids derived from shikimate pathway map012102-Oxocarboxylic acid metabolism map01230Biosynthesis of amino acids map0201…	map00280 map00290 map00460 map00770 map00966 map00970 map01063 map01210 map01230 map02010	_x000D_ C5H11NO2	Amino acids
211	Ethyl phosphoric acid	Ethyl phosphoric acid (2TMS)	n/a	n/a	n/a	n/a	n/a	n/a	n/a	Phosphoric acid derivatives; Phosphoric acid
184	RT_14.25 (Carboxylic acid)	RT_14.25 (Carboxylic acid)	RT14.25	n/a	n/a	n/a	n/a	n/a	n/a	Carboxylic acids
179	Benzoic acid	Benzoic acid (1TMS)	Benzoate; Benzenecarboxylic acid; Phenylformic acid; Dracylic acid	C00180	A128003	243	map00360Phenylalanine metabolism map00362Benzoate degradation map00621Dioxin degradation map00623Toluene degradation map00627Aminobenzoate degradation map01063Biosynthesis of alkaloids derived from shikimate pathway map01100Metabolic pathways map01110Biosynthesis of secondary metabolites map01120Microbial metabolism in diverse environments map01220Degradation of aromatic compounds	map00360 map00362 map00621 map00623 map00627 map01063 map01100 map01110 map01120 map01220	C7H6O2	Carboxylic acids
147	β-Alanine	β-Alanine (3TMS)	beta-Alanine; 3-Aminopropionic acid; 3-Aminopropanoate	C00099	A144001	239	map00240Pyrimidine metabolism map00410beta-Alanine metabolism map00640Propanoate metabolism map00770Pantothenate and CoA biosynthesis	map00240 map00410 map00640 map00770	C3H7NO2	Amino acids
116	L-Serine	L-Serine (2TMS)	L-2-Amino-3-hydroxypropionic acid; L-3-Hydroxy-alanine; Serine	C00065	A138001	5951	map00260Glycine, serine and threonine metabolism map00261Monobactam biosynthesis map00270Cysteine and methionine metabolism map00460Cyanoamino acid metabolism map00600Sphingolipid metabolism map00630Glyoxylate and dicarboxylate metabolism map00680Methane metabolism map00920Sulfur metabolism map00970Aminoacyl-tRn/a biosynthesis map01060Biosynthesis of plant secondary metabolites map01110Biosynthes…	map00260 map00261 map00270 map00460 map00600 map00630 map00680 map00920 map00970 map01060 map01110 map01200 map01230	C3H7NO3	Amino acids
174	Ethanolamine	Ethanolamine (3TMS)	Aminoethanol; 2-Hydroxyethylamine	C00189	A128002	3489	map00564Glycerophospholipid metabolism	map00564 map01100 map04723	C2H7NO	Alcohols; Amino alcohols
299	Phosphoric acid	Phosphoric acid (3TMS)	Orthophosphate; Phosphate; Orthophosphoric acid	C00009	A129001	1004	map00190Oxidative phosphorylation map00550Peptidoglycan biosynthesis	map00190 map00550	H3PO4	Phosphoric acid derivatives; Phosphoric acid
205	Glycerol	Glycerol (3TMS)	Glycerin; 1,2,3-Trihydroxypropane; 1,2,3-Propanetriol	C00116	A129003	753	map00040Pentose and glucuronate interconversions map00052Galactose metabolism map00561Glycerolipid metabolism map02010ABC transporters	map00040 map00052 map00561 map02010	C3H8O3	Carbohydrates; Carbohydrate derivatives; Sugar alcohols
180	Nicotinic acid	Nicotinic acid (1TMS)	Nicotinate; Niacin; 3-Pyridinecarboxylic acid	C00253	A133004	938	map00760Nicotinate and nicotinamide metabolism map00960Tropane, piperidine and pyridine alkaloid biosynthesis map01060Biosynthesis of plant secondary metabolites map01064Biosynthesis of alkaloids derived from ornithine, lysine and nicotinic acid map01100Metabolic pathways map01110Biosynthesis of secondary metabolites map01120Microbial metabolism in diverse environments map05133Pertussis	map00760 map00960 map01060 map01064 map01100 map01110 map01120 map05133	C6H5NO2	Carboxylic acids; Vitamins
73	L-Threonine	L-Threonine (2TMS)	2-Amino-3-hydroxybutyric acid	C00188	A132001	6288	map00260Glycine, serine and threonine metabolism map00261Monobactam biosynthesis map00290Valine, leucine and isoleucine biosynthesis map00860Porphyrin and chlorophyll metabolism map00970Aminoacyl-tRNA biosynthesis map01060Biosynthesis of plant secondary metabolites map01110Biosynthesis of secondary metabolites map01230Biosynthesis of amino acids map02010ABC transporters	map00260 map00261 map00290 map00860 map00970 map01060 map01110 map01230 map02010	C4H9NO3	Amino acids
147	Maleic acid	Maleic acid (2TMS)	Maleate; cis-Butenedioic acid	C01384	A133003	444266	map00350Tyrosine metabolism map00650Butanoate metabolism map00760Nicotinate and nicotinamide metabolism map01120Microbial metabolism in diverse environments	map00350 map00650 map00760 map01120	C4H4O4	Carboxylic acids
174	Glycine	Glycine (3TMS)	Aminoacetic acid; Gly	C00037	A133001	750	map00120Primary bile acid biosynthesis map00230Purine metabolism map00260Glycine, serine and threonine metabolism map00310Lysine degradation map00460Cyanoamino acid metabolism map00480Glutathione metabolism map00630Glyoxylate and dicarboxylate metabolism map00680Methane metabolism map00730Thiamine metabolism map00860Porphyrin and chlorophyll metabolism map00970Aminoacyl-tRNA biosynthesis map01060…	map00120 map00230 map00260 map00310 map00460 map00480 map00630 map00680 map00730 map00860 map00970 map01060 map01100 map01110 map01120 map01130 map01200 map01230 map01502 map02010 map04080 map04721 map04974 map04978 map05230	C2H5NO2	Amino acids
147	Succinic acid	Succinic acid (2TMS)	Succinate; Butanedionic acid; Ethylenesuccinic acid	C00042	A134001	1110	map00020Citrate cycle (TCA cycle) map00190Oxidative phosphorylation map00250Alanine, aspartate and glutamate metabolism map00350Tyrosine metabolism map00360Phenylalanine metabolism map00620Pyruvate metabolism map00630Glyoxylate and dicarboxylate metabolism map00640Propanoate metabolism map00650Butanoate metabolism map00760Nicotinate and nicotinamide metabolism map01061Biosynthesis of phenylpropan…	map00020 map00190 map00250 map00350 map00360 map00361 map00620 map00630 map00640 map00650 map00760 map00920 map01061 map01062 map01063 map01064 map01065 map01067	C4H6O4	Carboxylic acids
184	L-Ornithine	L-Ornithine (3TMS)	(S)-2,5-Diaminovaleric acid; (S)-2,5-Diaminopentanoic acid; (S)-2,5-Diaminopentanoate	C00077	A162001	6262	map00220Arginine biosynthesis map00330Arginine and proline metabolism map00472D-Arginine and D-ornithine metabolism map00480Glutathione metabolism map01060Biosynthesis of plant secondary metabolites map01064Biosynthesis of alkaloids derived from ornithine, lysine and nicotinic acid map01100Metabolic pathways map01110Biosynthesis of secondary metabolites map01130Biosynthesis of antibiotics map0121…	map00220 map00330 map00472 map00480 map01060 map01064 map01100 map01110 map01130 map01210 map01230 map02010	C5H12N2O2	Amino acids
147	Glyceric acid	Glyceric acid (3TMS)	D-Glycerate; Glycerate; (R)-Glycerate	C00258	A135003	439194	map00030Pentose phosphate pathway map00260Glycine, serine and threonine metabolism map00561Glycerolipid metabolism map00630Glyoxylate and dicarboxylate metabolism map00680Methane metabolism map01100Metabolic pathways map01110Biosynthesis of secondary metabolites map01120Microbial metabolism in diverse environments map01130Biosynthesis of antibiotics map01200Carbon metabolism	map00030 map00260 map00561 map00630 map00680 map01100 map01110 map01120 map01130 map01200	C3H6O4	Carboxylic acids
245	Fumaric acid	Fumaric acid (2TMS)	Fumarate; trans-Butenedioic acid	C00122	A137001	444972	map00020Citrate cycle (TCA cycle) map00190Oxidative phosphorylation map00220Arginine biosynthesis map00250Alanine, aspartate and glutamate metabolism map00350Tyrosine metabolism map00360Phenylalanine metabolism map00620Pyruvate metabolism map00643Styrene degradation map00650Butanoate metabolism map00760Nicotinate and nicotinamide metabolism map01061Biosynthesis of phenylpropanoids map01062Biosynt…	map00020 map00190 map00220 map00250 map00350 map00360 map00620 map00643 map00650 map00760 map01061 map01062 map01063 map01064 map01065 map01066	C4H4O4	Carboxylic acids
215	Nonanoic acid	Nonanoic acid (1TMS)	Nonanoate; Pelargonic acid	C01601	A138003	8158	n/a	n/a	C9H18O2	Fatty acyls; Fatty acids and conjugates
188	L-Asparagine	L-Asparagine (3TMS)	2-Aminosuccinamic acid	C00152	A168001	6267	map00250Alanine, aspartate and glutamate metabolism map00460Cyanoamino acid metabolism map00970Aminoacyl-tRNA biosynthesis map01060Biosynthesis of plant secondary metabolites map01100Metabolic pathways map01110Biosynthesis of secondary metabolites map01230Biosynthesis of amino acids	map00250 map00460 map00970 map01060 map01110 map01230	C4H8N2O3	Amino acids
204	L-Serine	L-Serine (3TMS)	L-2-Amino-3-hydroxypropionic acid; L-3-Hydroxy-alanine; Serine	C00065	A138001	5951	map00260Glycine, serine and threonine metabolism map00261Monobactam biosynthesis map00270Cysteine and methionine metabolism map00460Cyanoamino acid metabolism map00600Sphingolipid metabolism map00630Glyoxylate and dicarboxylate metabolism map00680Methane metabolism map00920Sulfur metabolism map00970Aminoacyl-tRn/a biosynthesis map01060Biosynthesis of plant secondary metabolites map01100Metabolic …	map00260 map00261 map00270 map00460 map00600 map00630 map00680 map00920 map00970 map01060 map01100 map01110 map01120 map01130 map01200 map01230 map01502 map02010 map04071 map04974 map04978 map05230	C3H7NO3	Amino acids
147	Threonic acid-1,4-lactone	Threonic acid-1,4-lactone (2TMS)	L-Threonic acid-1,4-lactone; Threonolactone; 21730-93-8; Threonic acid-1,4-lactone; (3R,4S)-3,4-dihydroxyoxolan-2-one; L-Threonolactone	n/a	A140005	2724794	n/a	n/a	C4H6O4	Carboxylic acids; Carboxylic acids esters
218	L-Threonine	L-Threonine (3TMS)	2-Amino-3-hydroxybutyric acid	C00188	A140001	6288	map00260Glycine, serine and threonine metabolism map00261Monobactam biosynthesis map00290Valine, leucine and isoleucine biosynthesis map00860Porphyrin and chlorophyll metabolism map00970Aminoacyl-tRNA biosynthesis map01060Biosynthesis of plant secondary metabolites map01100Metabolic pathways map01110Biosynthesis of secondary metabolites map01120Microbial metabolism in diverse environments map0113…	map00260 map00261 map00290 map00860 map00970 map01060 map01100 map01110 map01120 map01130 map01230 map02010 map04974 map04978	C4H9NO3	Amino acids
160	L-Aspartic acid	L-Aspartic acid (3TMS)	L-Aspartate; 2-Aminosuccinic acid; L-Asp	C00049	A152002	5960	map00220Arginine biosynthesis map00250Alanine, aspartate and glutamate metabolism map00260Glycine, serine and threonine metabolism map00261Monobactam biosynthesis map00270Cysteine and methionine metabolism map00300Lysine biosynthesis map00340Histidine metabolism map00410beta-Alanine metabolism map00460Cyanoamino acid metabolism map00710Carbon fixation in photosynthetic organisms map00760Nicotinat…	map00220 map00300 map00340 map00410 map00460 map00710 map00760 map00770 map00970 map01060 map01064 map01070 map01100 map01110 map01120 map01130 map01200 map012102 map01230 map02010 map02020 map02030 map04080 map04974 map05230	C4H7NO4	Amino acids
232	Aspartic acid	Aspartic acid (3TMS)	L-Aspartate; 2-Aminosuccinic acid; L-Asp	C00049	A152002	3351	map00220Arginine biosynthesis map00250Alanine, aspartate and glutamate metabolism map00260Glycine, serine and threonine metabolism map00270Cysteine and methionine metabolism map00300Lysine biosynthesis map00340Histidine metabolism map00410beta-Alanine metabolism map00460Cyanoamino acid metabolism map00760Nicotinate and nicotinamide metabolism map00770Pantothenate and CoA biosynthesis map00970Amin…	map00220 map00250 map00260 map00270 map00300 map00340 map00410 map00460 map00760 map00770 map00970 map01064 map01210 map01230 map02010	C4H7NO4	Amino acids
147	Malic acid	Malic acid (3TMS)	(S)-Malate; L-Malate; L-Apple acid; L-Malic acid; L-2-Hydroxybutanedioic acid; Malate; Malic acid	C00149	A149001	222656	map00020Citrate cycle (TCA cycle) map00620;Pyruvate metabolism map00630Glyoxylate and dicarboxylate metabolism map00680Methane metabolism map01061Biosynthesis of phenylpropanoids map01062Biosynthesis of terpenoids and steroids map01063Biosynthesis of alkaloids derived from shikimate pathway map01064Biosynthesis of alkaloids derived from ornithine, lysine and nicotinic acid map01065Biosynthesis of…	map00020 map00620 map00630 map00680 map01061 map01062 map01063 map01064 map01065 map01066	C4H6O5	Carboxylic acids
156	Pyroglutamic acid	Pyroglutamic acid (2TMS)	Pidolic acid; 5-Oxoproline; 5-Pyrrolidone-2-carboxylic acid; Pyroglutamate; 5-Oxo-L-proline; L-Pyroglutamic acid; L-5-Pyrrolidone-2-carboxylic acid	C01879	A153002	7405	map00480 Glutathione metabolism	map00480	C5H7NO3	Amino acids
217	D-Threitol	D-Threitol (4TMS)	D-Threitol	C16884	A149002	169019	R08573 R11342	R08573 R11342	C4H10O4	Carbohydrates; Carbohydrate derivatives; Sugar alcohols
174	GABA	GABA (3TMS)	4-Aminobutanoate; 4-Aminobutanoic acid; 4-Aminobutyrate; 4-Aminobutyric acid; gamma-Aminobutyric acid; GABA	C00334	A153003	119	map00250Alanine, aspartate and glutamate metabolism map00330Arginine and proline metabolism map00410beta-Alanine metabolism map00650Butanoate metabolism map00760Nicotinate and nicotinamide metabolism	map00250 map00330 map00410 map00650 map00760	C4H9NO2	Amino acids
243	Dodecanol	1-Dodecanol (1TMS)	Dodecylalcohol; Dodecyl alcohol; Lauryl alcohol	C02277	n/a	8193	n/a	n/a	C12H26O	Fatty acyls; Fatty alcohols
292	Threonic acid	Threonic acid (4TMS)	Threonate; L-Threonate; (2R,3S)-2,3,4-Trihydroxybutanoic acid	C01620	A156001	5460407	map00053Ascorbate and aldarate metabolism	map00053	C4H8O5	Fatty acyls; Fatty acids and conjugates
73	α-Ketoglutaric	a-Ketoglutaric (2TMS)	2-Oxoglutarate; Oxoglutaric acid; 2-Ketoglutaric acid; alpha-Ketoglutaric acid	C00026	A000138	51	map00020Citrate cycle (TCA cycle) map00040Pentose and glucuronate interconversions map00053Ascorbate and aldarate metabolism map00220Arginine biosynthesis map00250Alanine, aspartate and glutamate metabolism map00300Lysine biosynthesis map00340Histidine metabolism map00365Furfural degradation map00430Taurine and hypotaurine metabolism map00471D-Glutamine and D-glutamate metabolism map00630Glyoxyla…	map00020 map00040 map00053 map00220 map00250 map00300 map00340 map00365 map00430 map00471 map00630 map00650 map00660 map00720 map01060 map01061 map01062 map01063 map01064 map01065 map01066 map01070 map01100 map01110 map01120 map01130 map01200 map01210 map01230 map04066 map04727 map04922 map04964 map04976 map05230	C5H6O5	Carboxylic acids
306	RT23.83 (Carbohydrate)	RT23.83 (Carbohydrate)	n/a	n/a	n/a	n/a	n/a	n/a	Carbohydrates	n/a
246	L-Glutamine	L-Glutamine (3TMS)	L-2-Aminoglutaramic acid	C00064	A163001	5961	map00220Arginine biosynthesis map00250Alanine, aspartate and glutamate metabolism map00330Arginine and proline metabolism map00332Carbapenem biosynthesis map00340Histidine metabolism map00430Taurine and hypotaurine metabolism map00471D-Glutamine and D-glutamate metabolism map00480Glutathione metabolism map00524Neomycin, kanamycin and gentamicin biosynthesis map00630Glyoxylate and dicarboxylate me…	map00220 map00250 map00330 map00332 map00340 map00430 map00471 map00480 map00524 map00630 map00650 map00660 map00910 map00970 map01060 map01064 map01100 map01110 map01120 map01130 map01200 map01210 map01230 map02010 map02020 map04068 map04072 map04080 map04216 map04540 map04713 map04720 map04721 map04723 map04724 map04727 map04730 map04742 map04964 map04974 map05014 map05016 map05030 map05031 map…	C5H10N2O3	Amino acids
221	RT_25.05 (Carbohydrate)	RT_25.05 (Carbohydrate)	RT_25.05 (Carbohydrate)	n/a	n/a	n/a	n/a	n/a	n/a	Carbohydrates
217	RT_25.31 (Carbohydrate)	RT_25.31 (Carbohydrate)	RT_25.31 (Carbohydrate)	n/a	n/a	n/a	n/a	n/a	n/a	Carbohydrates
204	D-Ribose	Ribofuranoside	C00121	A168002	5779	50-69-1	n/a	150.053	pentoses	Carbohydrates
357	Glycerol-3-phosphate	Glycerol-3-phosphate (4TMS)	DL-Glycerol 1-phosphate; Glycerol 1-phosphate; Glycerol-3-phosphate; rac-Glycerol 1-phosphate; DL-Glyceryl 1-phosphate; DL-Glycerol 3-phosphate	C00093	A177002	754	map00561Glycerolipid metabolism map00564Glycerophospholipid metabolism map01100Metabolic pathwaysmap01110Biosynthesis of secondary metabolites map02010ABC transporters map05231Choline metabolism in cancer	map00561 map00564 map01100 map01110 map02010 map05231	C3H9O6P	Carbohydrates; Carbohydrates; Carbohydrate derivatives; Carbohydrate phosphates
317	Azelaic acid	Azelaic Acid (2TMS)	1,7-Dicarboxyheptane	C08261	A181007	2266	n/a	n/a	C9H16O4	Fatty acyls; Fatty acids and conjugates
319	RT28,29 (Carbohydrate)	RT28,29 (Carbohydrate)	RT28,29 (Carbohydrate)	n/a	n/a	n/a	n/a	n/a	n/a	Carbohydrates; Carbohydrate derivatives; Sugar alcohols
204	Shikimic Acid	Shikimic Acid (4TMS)	Shikimate; 3,4,5-Trihydroxy-1-cyclohexenecarboxylic acid	C00493	A181002	8742	map00400Phenylalanine, tyrosine and tryptophan biosynthesismap01060Biosynthesis of plant secondary metabolites map01061Biosynthesis of phenylpropanoid map01063Biosynthesis of alkaloids derived from shikimate pathway map01070Biosynthesis of plant hormones map01100Metabolic pathways map01110Biosynthesis of secondary metabolites map01130Biosynthesis of antibiotics map01230Biosynthesis of amino acids	map00400 map01060 map01061 map01063 map01070 map01100 map01110 map01130 map01230	C7H10O5	Carboxylic acids
273	Citric acid	Citric acid (4TMS)	Citrate; 2-Hydroxy-1,2,3-propanetricarboxylic acid; 2-Hydroxytricarballylic acid	C00158	A182004	311	map00020Citrate cycle (TCA cycle) map00250Alanine, aspartate and glutamate metabolism map00630Glyoxylate and dicarboxylate metabolism map00720Carbon fixation pathways in prokaryotes map01060Biosynthesis of plant secondary metabolites map01061Biosynthesis of phenylpropanoids map01062Biosynthesis of terpenoids and steroids map01063Biosynthesis of alkaloids derived from shikimate pathway map01064Bio…	map00020 map00250 map00630 map00720 map01060 map01061 map01062 map01063 map01064 map01065 map01066 map01070 map01100 map01110 map01120 map01130 map01200 map01210 map01230 map02020 map04742 map04922 map05230	C6H8O7	Carboxylic acids
285	Myristic acid	Myristic acid (1TMS)	Tetradecanoic acid; Tetradecanoate	C06424	A204021	11005	map00061Fatty acid biosynthesis	map00061	C14H28O2	Fatty acyls; Fatty acids and conjugates
73	2-Ketoglutaric acid	2-Ketoglutaric acid (2TMS)	Oxoglutarate: a-Ketoglutaric acid: 2-oxo-1,5-Pentanedioate	C00026	A158004	51	map00020Citrate cycle (TCA cycle) map00040Pentose and glucuronate interconversions map00053Ascorbate and aldarate metabolism map00220Arginine biosynthesis map00250Alanine, aspartate and glutamate metabolism map00300Lysine biosynthesis map00340Histidine metabolism map00365Furfural degradation map00430Taurine and hypotaurine metabolism map00471D-Glutamine and D-glutamate metabolism map00630Glyoxyla…	map00020 map00040 map00053 map00220 map00250 map00300 map00340 map00365 map00430 map00471 map00630 map00650 map00660 map00720 map01060 map01061 map01062 map01063 map01064 map01065 map01066 map01070 map01100 map01110 map01120 map01130 map01200 map01210 map01230 map04066 map04727 map04922 map04964 map04976 map05230	C5H6O5	Carboxylic acids
81	RT_29.62 (Hydrocarbon)	RT_29.62 (Hydrocarbon)	RT_29.62 (Hydrocarbon)	n/a	n/a	n/a	n/a	n/a	n/a	Hydrocarbon
97	RT_30.00 (Nitriles)	RT_30.00 (Nitriles)	RT_30.00 (Nitriles)	n/a	n/a	n/a	n/a	n/a	n/a	Nitriles
307	D-Fructose	D-Fructose (1MEOX, 5TMS)	Levulose; Fruit sugar; D-arabino-Hexulose	C00095	A188004	439163	map00051Fructose and mannose metabolism map00052Galactose metabolism map00500Starch and sucrose metabolism map01100Metabolic pathways map01120Microbial metabolism in diverse environments map02010ABC transporters map02060Phosphotransferase system (PTS) map04742Taste transduction map04931Insulin resistance map04973Carbohydrate digestion and absorption	map00051 map00052 map00500 map01100 map01120 map02010 map02060 map04742 map04931 map04973	C6H12O6	Carbohydrates
319	RT30.62 (Carbohydrate)	RT30.62 (Carbohydrate)	RT30.62 (Carbohydrate)	n/a	n/a	n/a	n/a	n/a	n/a	Carbohydrates
319	D-Glucose	D-Glucose (1 MEOX, 5TMS)	Grape sugar; Dextrose; Glucose; D-Glucopyranose	C00031	A191001	5793	map00010Glycolysis / Gluconeogenesis map00030Pentose phosphate pathway map00052Galactose metabolism map00500Starch and sucrose metabolism map00520Amino sugar and nucleotide sugar metabolism map00524Neomycin, kanamycin and gentamicin biosynthesis map00901Indole alkaloid biosynthesis map01110Biosynthesis of secondary metabolites map02010ABC transporters	map00010 map00030 map00052 map00500 map00520 map00524 map00901 map01110 map02010	C6H12O6	Carbohydrates
242	3-Deoxy-ribo-hexonic acid, 1,4-lactone	3-Deoxy-ribo-hexonic acid, 1,4-lactone (3TMS)	3-Deoxy-ribo-hexonic acid, 1,4-lactone	n/a	n/a	152990	n/a	n/a	C6H12O6	Carbohydrates; Sugar acids; Gluconates
204	D-Mannitol	D-Mannitol (6TMS)	Mannitol	C00392	A193002	6251	map00051Fructose and mannose metabolism map02010ABC transporters map02060Phosphotransferase system (PTS)	map00051 map02010 map02060	C6H14O6	Carbohydrates; Carbohydrate derivatives; Sugar alcohols
204	D-Glucose	D-Glucose (5TMS)	Grape sugar; Dextrose; Glucose; D-Glucopyranose	C00031	A191001	5793	map00010Glycolysis / Gluconeogenesis map00030Pentose phosphate pathway map00052Galactose metabolism map00500Starch and sucrose metabolism map00520Amino sugar and nucleotide sugar metabolism map00901Indole alkaloid biosynthesis map02010ABC transporters	map00010 map00030 pathway map00052 map00500 map00520 map00901 map02010	C6H12O6	Carbohydrates
292	D-Gluconic acid	D-Gluconic acid (6TMS)	D-Gluconate; D-gluco-Hexonic acid	C00257	A196001	10690	map00030Pentose phosphate pathway map01100Metabolic pathways map01110Biosynthesis of secondary metabolites map01120Microbial metabolism in diverse environments map01130Biosynthesis of antibiotics map01200Carbon metabolism	map00030 map01100 map01110 map01120 map01130 map01200	C6H12O7	Carbohydrates; Carbohydrate derivatives; Sugar acids
313	Palmitic acid	Palmitic acid (1TMS)	Hexadecanoic acid; Hexadecanoate; Hexadecylic acid; Palmitate; Cetylic acid	C00249	A205001	985	map00061Fatty acid biosynthesis map00062Fatty acid elongation map00071Fatty acid degradation map00073Cutin, suberine and wax biosynthesis map01040Biosynthesis of unsaturated fatty acids map01060Biosynthesis of plant secondary metabolites map01212Fatty acid metabolism	map00061 map00062 map00071 map00073 map01040 map01060 map01212	C16H32O2	Fatty acyls; Fatty Acids and Conjugates
204	RT_32.33 (Carbohydrate)	RT_32.33 (Carbohydrate)	RT_32.33 (Carbohydrate)	n/a	n/a	n/a	n/a	n/a	n/a	Carbohydrates
122	Oleanitrile	Oleonitrile	Oleic acid nitrile; 9-Octadecenenitrile, (Z)-; Oleoylnitrile; Oleylonitrile; Oleic nitrile	n/a	n/a	6420241	n/a	n/a	C18H33N	Fatty acyls; Fatty nitriles
97	RT_33.91 (Nitriles)	RT_33.91 (Nitriles)	RT_33.91 (Nitriles)	n/a	n/a	n/a	n/a	n/a	n/a	Nitriles
305	Myo-inositol	Myo-inositol (6TMS)	D-myo-Inositol; 1D-myo-Inositol; L-myo-Inositol; 1L-myo-Inositol; meso-Inositol; Inositol; Dambose; Cyclohexitol; Meat sugar	C00137	A209002	892	map00052Galactose metabolism map00053Ascorbate and aldarate metabolism map00521Streptomycin biosynthesis map00562Inositol phosphate metabolism map01120Microbial metabolism in diverse environments map01130Biosynthesis of antibiotics map02010ABC transporters map04070Phosphatidylinositol signaling system	map00052 map00053 map00521 map00562 map01130 map02010 map04070	C6H12O6	Carbohydrates; Carbohydrate derivatives; Sugar alcohols
328	Margaric acid	Margaric acid (1TMS)	Heptadecanoic acid	C16536	A214005	10465	n/a	n/a	C17H32O2	Fatty acyls; Fatty acids and conjugates
396	Caffeic acid	Caffeic acid (3TMS)	Caffeate; 3,4-Dihydroxy-trans-cinnamate; trans-Caffeate; (2E)-3-(3,4-Dihydroxyphenyl)prop-2-enoate	C01197	A214001	689043	map00940Phenylpropanoid biosynthesis map01061Biosynthesis of phenylpropanoids map01100Metabolic pathways map01110Biosynthesis of secondary metabolites map01220Degradation of aromatic compounds	map00940 map01061 map01100 map01110 map01220	C9H8O4	Carboxylic acids; Phenylpropanoids
319	Sedoheptulose	Sedoheptulose (1MEOX, 6TMS)	D-altro-Heptulose; D-Sedoheptulose; Volemulose	C02076	n/a	439645	map00710Carbon fixation in photosynthetic organisms	map00710	C7H14O7	Carbohydrates
327	1-Octadecanol	1-Octadecanol (1TMS)	Stearyl alcohol	n/a	n/a	8221	n/a	n/a	C18H38O	Fatty acyls; Fatty alcohols
319	RT35.11 (Carbohydrate)	RT35.11 (Carbohydrate)	n/a	n/a	n/a	n/a	n/a	n/a	n/a	Carbohydrates; Carbohydrates; Carbohydrate derivatives; Carbohydrate phosphates
319	RT35.26 (Carbohydrate)	RT35.26 (Carbohydrate)	RT35.26 (Carbohydrate)	n/a	n/a	n/a	n/a	n/a	n/a	Carbohydrates
319	RT35.34 (Carbohydrate; Sugar alcohol)	RT35.34 (Carbohydrate; Sugar alcohol)	RT35.34 (Carbohydrate; Sugar alcohol)	n/a	n/a	n/a	n/a	n/a	n/a	Carbohydrates; Carbohydrate derivatives; Sugar alcohols
319	RT35.47 (Carbohydrate)	RT35.47 (Carbohydrate)	n/a	n/a	n/a	n/a	n/a	n/a	n/a	Carbohydrates
337	Linoleic acid	Linoleic acid (1TMS)	Linoleate; (9Z,12Z)-Octadecadienoic acid; 9-cis,12-cis-Octadecadienoate; 9-cis,12-cis-Octadecadienoic acid	C01595	A221003	5280450	map00591Linoleic acid metabolism map01040Biosynthesis of unsaturated fatty acids map01060Biosynthesis of plant secondary metabolites	map00591 map01040 map01060	C18H32O2	Fatty acyls; Fatty acids and conjugates
339	Oleic Acid	Oleic Acid (TMS)	(9Z)-Octadecenoic acid; (Z)-Octadec-9-enoic acid; Oleate; Oleic acid	C00712	n/a	3978	map00061Fatty acid biosynthesis map00073Cutin, suberine and wax biosynthesis map01040Biosynthesis of unsaturated fatty acids map01060Biosynthesis of plant secondary metabolites map04212Longevity regulating pathway - worm	map00061 map00073 map01040 map01060 map04212	C18H34O2	Fatty acids
315	α-Linolenic acid	a-Linolenic acid (1TMS)	(9Z,12Z,15Z)-Octadecatrienoic acid; alpha-Linolenic acid; 9,12,15-Octadecatrienoic acid; Linolenate; alpha-Linolenate	C06427	A222003	5280934	map00592alpha-Linolenic acid metabolism map01040Biosynthesis of unsaturated fatty acids map01060Biosynthesis of plant secondary metabolites map01070Biosynthesis of plant hormones	map00592 map01040 map01060 map01070	C18H30O2	Fatty acyls; Fatty acids and conjugates
204	RT36.24 (Carbohydrate)	RT36.24 (Carbohydrate)	RT36.24 (Carbohydrate)	n/a	n/a	n/a	n/a	n/a	n/a	Carbohydrates
341	Stearic acid	Stearic acid (1TMS)	Octadecanoic acid; Stearate	C01530	A225002	5281	map00061Fatty acid biosynthesis map01040Biosynthesis of unsaturated fatty acids	map00061 map01040	C18H36O2	Fatty acyls; Fatty acids and conjugates
59	Oleic acid amide	Oleic acid amide	(9Z)-Octadecenoic acid; (Z)-Octadec-9-enoic acid; Oleate	C19670	n/a	5283387	n/a	n/a	C18H35NO	Fatty acyls; Fatty Amides
204	2-O-Glycerol-α-d-galactopyranoside	2-O-Glycerol--α-d-galactopyranoside (6TMS)	2-O-Glycerol--α-d-galactopyranoside	n/a	n/a	91754126	n/a	n/a	n/a	Carbohydrates; Glycosides
343	1-Monomyristin	1-Monomyristin (2TMS)	1-Monomyristin	n/a	n/a	79050	n/a	n/a	C17H34O4	Fatty acyls; Fatty acids and conjugates
338	Oleamide	Oleamide (1TMS)	Oleyl amide; (Z)-9-Octadecenamide; (cis)-9-Octadecenoic acid; Oleic acid amide	C19670	A223003	5283387	n/a	n/a	C18H35NO	Fatty acyls; Fatty acids and conjugates
204	RT40.03 (Carbohydrate; Sugar alcohol)	RT40.03 (Carbohydrate; Sugar alcohol)	RT40.03 (Carbohydrate; Sugar alcohol)	n/a	n/a	n/a	n/a	n/a	n/a	Carbohydrates; Carbohydrate derivatives; Sugar alcohols
318	D-Myo-inositol phosphate	D-myo-Inositol 1,3,5,6-5P (7TMS)	D-myo-Inositol 1,3,4,5,6-pentakisphosphate; Inositol 1,3,4,5,6-pentakisphosphate	C01284	n/a	439468	map00562Inositol phosphate metabolism map01100Metabolic pathways map04070Phosphatidylinositol signaling system	map00562 map01100 map04070	C6H17O21P5	Carbohydrates; Phosphoric acid derivatives
204	RT_40.18 (Carbohydrate)	RT_40.18 (Carbohydrate)	RT_40.18 (Carbohydrate)	n/a	n/a	n/a	n/a	n/a	n/a	Carbohydrates
204	RT_41.88 (Carbohydrate)	RT_41.88 (Carbohydrate)	RT_41.88 (Carbohydrate)	n/a	n/a	n/a	n/a	n/a	n/a	Carbohydrates
371	Monopalmitin	1-Monopalmitin (2TMS)	Monopalmitin	C00249	n/a	985	map00061Fatty acid biosynthesis map00062Fatty acid elongation map00071Fatty acid degradation map00073Cutin, suberine and wax biosynthesis map01040Biosynthesis of unsaturated fatty acids map01060Biosynthesis of plant secondary metabolites map01212Fatty acid metabolism	map00061 map00062 map00071 map00073 map01040 map01060 map01212	C16H32O2	Fatty acyls; Fatty acids and conjugates
204	RT_42.54 (Carbohydrate)	RT_42.54 (Carbohydrate)	RT_42.54 (Carbohydrate)	n/a	n/a	n/a	n/a	n/a	n/a	Carbohydrates
361	α-α-Trehalose	a-a-Trehalose	a-a-Trehalose	C01083	A274002	521102	map00500Starch and sucrose metabolism map01100Metabolic pathways map01110Biosynthesis of secondary metabolites map02010ABC transporters map02060Phosphotransferase system (PTS)	map00500 map02010 map02060	C12H22O11	Carbohydrates; Disaccharides
204	RT_44.32 (Carbohydrate)	RT_44.32 (Carbohydrate)	RT_44.32 (Carbohydrate)	n/a	n/a	n/a	n/a	n/a	n/a	Carbohydrates
399	RT_45.73 (Fatty acid)	RT_45.73 (Fatty acid)	RT_45.73 (Fatty acid)	n/a	n/a	n/a	n/a	n/a	n/a	Fatty acyls; Fatty acids and conjugates
